# Supplementary material
Source: Frontiers journal article supplement (https://www.frontiersin.org/articles/377831)
Supplement: Image_1.PDF [file Image_1.PDF]

## Supplemental Materials

### *ATPase assay*

The rate NADH oxidation was monitored over several minutes by measuring the absorbance changes at 340 nm, based on NADH an extinction coefficient of  $\epsilon_{340} = 6,220 \text{ M}^{-1}\cdot\text{cm}^{-1}$  using a spectrophotometer. The rate of NADH oxidation was plotted and fit to a line with the slope taken as the steady-state value and subsequently converted to  $\text{Pi/sec/myosin head}$  based on the HMM concentration in the assay. These measurements were obtained over a range of actin concentrations (1-50 $\mu\text{M}$ ) and used to obtain values of  $V_{\text{max}}$  and  $K_m$ . To compare among conditions the ATPase rate at saturating actin concentrations were used in the ANOVA.

### *Analysis of mini-ensemble laser trap assay data*

These data were analyzed using a custom Matlab program previously described (Longyear et al. 2017). Briefly, the program employs a threshold algorithm that scores displacements that had greater than 8 nm from a defined baseline that have a duration  $\geq 10$  ms. These values were chosen based on the lower limit of the average displacement for two-headed skeletal muscle myosin (Tyska and Warshaw 1999) and the expected lifetime of actomyosin strong-binding at 100 $\mu\text{M}$  ATP 10 ms (White and Taylor 1976). The highest force sustained for  $\geq 10$  ms during a binding event was taken as the peak force. Event duration was determined based on the time spent  $> 8\text{nm}$  from baseline and event frequency was determined by dividing the number of events by the total time of the displacement recording (typically 10-30sec each).

### *Statistical Analysis*

Differences among the different conditions in the laser trap data were determined using a non-parametric Kruskal-Wallis ANOVA and associated post hoc test was used to locate differences. Non-parametric tests were used because the data force and lifetime data were not Normally-distributed (Shapiro-Wilk test) and had unequal variances (Unequal Variance test).

Differences among the difference conditions of the ATPase assay were determined using a one-way ANOVA followed by a Tukey's HSD to locate the differences. The ATPase data were fit with the Michealis-Menten relation to derive values for  $V_{\max}$  and  $K_m$ . All statistical analyses were performed using SigmaPlot® 11.0.
